# Supplementary material
Source: publisher figshare collection journal article supplement (https://acs.figshare.com/ndownloader/files/4592587)
Supplement: Supplementary file 1 [file 4592587]

 
data_shelxl 
 
_audit_creation_method            SHELXL-97 
_chemical_name_systematic 
; 
 ? 
; 
_chemical_name_common             ? 
_chemical_melting_point           ? 
_chemical_formula_moiety          ? 
_chemical_formula_sum 
 'C44 H52 Cu2 F6 N4' 
_chemical_formula_weight          877.98 
 
loop_ 
 _atom_type_symbol 
 _atom_type_description 
 _atom_type_scat_dispersion_real 
 _atom_type_scat_dispersion_imag 
 _atom_type_scat_source 
 'C'  'C'   0.0033   0.0016 
 'International Tables Vol C Tables 4.2.6.8 and 6.1.1.4' 
 'H'  'H'   0.0000   0.0000 
 'International Tables Vol C Tables 4.2.6.8 and 6.1.1.4' 
 'Cu'  'Cu'   0.3201   1.2651 
 'International Tables Vol C Tables 4.2.6.8 and 6.1.1.4' 
 'F'  'F'   0.0171   0.0103 
 'International Tables Vol C Tables 4.2.6.8 and 6.1.1.4' 
 'N'  'N'   0.0061   0.0033 
 'International Tables Vol C Tables 4.2.6.8 and 6.1.1.4' 
 
_symmetry_cell_setting            monoclinic 
_symmetry_space_group_name_H-M    'P2/c' 
 
loop_ 
 _symmetry_equiv_pos_as_xyz 
 'x, y, z' 
 '-x, y, -z+1/2' 
 '-x, -y, -z' 
 'x, -y, z-1/2' 
 
_cell_length_a                    12.23(2) 
_cell_length_b                    8.460(15) 
_cell_length_c                    23.49(4) 
_cell_angle_alpha                 90.00 
_cell_angle_beta                  101.43(2) 
_cell_angle_gamma                 90.00 
_cell_volume                      2382(7) 
_cell_formula_units_Z             2 
_cell_measurement_temperature     173(2) 
_cell_measurement_reflns_used     3567 
_cell_measurement_theta_min       1.6985 
_cell_measurement_theta_max       31.606 
 
_exptl_crystal_description        plate 
_exptl_crystal_colour             colorless 
_exptl_crystal_size_max           0.40 
_exptl_crystal_size_mid           0.26 
_exptl_crystal_size_min           0.20 
_exptl_crystal_density_meas       ? 
_exptl_crystal_density_diffrn     1.224 
_exptl_crystal_density_method     'not measured' 
_exptl_crystal_F_000              912 
_exptl_absorpt_coefficient_mu     0.947 
_exptl_absorpt_correction_type    'Multi-scan' 
_exptl_absorpt_correction_T_min   0.7031 
_exptl_absorpt_correction_T_max   0.8331 
_exptl_absorpt_process_details    'Rigaku' 
 
_exptl_special_details 
; 
 ? 
; 
 
_diffrn_ambient_temperature       173(2) 
_diffrn_radiation_wavelength      0.71075 
_diffrn_radiation_type            MoK\a 
_diffrn_radiation_source          'fine-focus sealed tube' 
_diffrn_radiation_monochromator   graphite 
_diffrn_measurement_device_type   ? 
_diffrn_measurement_method        ? 
_diffrn_detector_area_resol_mean  ? 
_diffrn_standards_number          ? 
_diffrn_standards_interval_count  ? 
_diffrn_standards_interval_time   ? 
_diffrn_standards_decay_%         ? 
_diffrn_reflns_number             25014 
_diffrn_reflns_av_R_equivalents   0.1119 
_diffrn_reflns_av_sigmaI/netI     0.1195 
_diffrn_reflns_limit_h_min        -17 
_diffrn_reflns_limit_h_max        17 
_diffrn_reflns_limit_k_min        -11 
_diffrn_reflns_limit_k_max        11 
_diffrn_reflns_limit_l_min        -33 
_diffrn_reflns_limit_l_max        33 
_diffrn_reflns_theta_min          1.70 
_diffrn_reflns_theta_max          31.89 
_reflns_number_total              7588 
_reflns_number_gt                 3365 
_reflns_threshold_expression      >2sigma(I) 
 
_computing_data_collection        ? 
_computing_cell_refinement        ? 
_computing_data_reduction         ? 
_computing_structure_solution     'SHELXS-97 (Sheldrick, 1990)' 
_computing_structure_refinement   'SHELXL-97 (Sheldrick, 1997)' 
_computing_molecular_graphics     ? 
_computing_publication_material   ? 
 
_refine_special_details 
; 
 Refinement of F^2^ against ALL reflections.  The weighted R-factor wR and 
 goodness of fit S are based on F^2^, conventional R-factors R are based 
 on F, with F set to zero for negative F^2^. The threshold expression of 
 F^2^ > 2sigma(F^2^) is used only for calculating R-factors(gt) etc. and is 
 not relevant to the choice of reflections for refinement.  R-factors based 
 on F^2^ are statistically about twice as large as those based on F, and R- 
 factors based on ALL data will be even larger. 
; 
 
_refine_ls_structure_factor_coef  Fsqd  
_refine_ls_matrix_type            full 
_refine_ls_weighting_scheme       calc  
_refine_ls_weighting_details 
 'calc w=1/[\s^2^(Fo^2^)+(0.1128P)^2^+0.7661P] where P=(Fo^2^+2Fc^2^)/3' 
_atom_sites_solution_primary      direct 
_atom_sites_solution_secondary    difmap 
_atom_sites_solution_hydrogens    geom 
_refine_ls_hydrogen_treatment     constr 
_refine_ls_extinction_method      none 
_refine_ls_extinction_coef        ? 
_refine_ls_number_reflns          7588 
_refine_ls_number_parameters      262 
_refine_ls_number_restraints      0 
_refine_ls_R_factor_all           0.2065 
_refine_ls_R_factor_gt            0.0946 
_refine_ls_wR_factor_ref          0.2684 
_refine_ls_wR_factor_gt           0.2139 
_refine_ls_goodness_of_fit_ref    1.043 
_refine_ls_restrained_S_all       1.043 
_refine_ls_shift/su_max           0.003 
_refine_ls_shift/su_mean          0.000 
 
loop_ 
 _atom_site_label 
 _atom_site_type_symbol 
 _atom_site_fract_x 
 _atom_site_fract_y 
 _atom_site_fract_z 
 _atom_site_U_iso_or_equiv 
 _atom_site_adp_type 
 _atom_site_occupancy 
 _atom_site_symetry_multiplicity 
 _atom_site_calc_flag 
 _atom_site_refinement_flags 
 _atom_site_disorder_assembly 
 _atom_site_disorder_group 
Cu1 Cu 0.5000 1.0000 0.0000 0.0531(3) Uani 1 2 d S . . 
Cu2 Cu 1.0000 0.40544(10) 0.2500 0.0401(2) Uani 1 2 d S . . 
F1 F 0.5957(4) 0.6872(5) 0.00972(18) 0.0957(13) Uani 1 1 d . . . 
F2 F 0.6252(3) 0.8120(5) 0.09421(15) 0.0946(13) Uani 1 1 d . . . 
F3 F 0.7231(3) 0.8743(6) 0.0277(2) 0.1068(15) Uani 1 1 d . . . 
N1 N 0.9131(3) 0.4376(5) 0.12172(16) 0.0458(10) Uani 1 1 d . . . 
N2 N 0.7825(3) 0.3666(5) 0.17064(16) 0.0453(10) Uani 1 1 d . . . 
C1 C 0.6134(5) 0.8433(8) 0.0339(3) 0.0673(17) Uani 1 1 d . . . 
C2 C 0.8937(4) 0.4040(6) 0.17569(19) 0.0414(10) Uani 1 1 d . . . 
C3 C 0.8093(4) 0.4305(8) 0.0739(2) 0.0587(15) Uani 1 1 d . . . 
H3A H 0.8191 0.3565 0.0427 0.070 Uiso 1 1 calc R . . 
H3B H 0.7893 0.5363 0.0570 0.070 Uiso 1 1 calc R . . 
C4 C 0.7187(5) 0.3678(8) 0.1083(2) 0.0618(15) Uani 1 1 d . . . 
H4A H 0.6537 0.4397 0.1035 0.074 Uiso 1 1 calc R . . 
H4B H 0.6929 0.2604 0.0953 0.074 Uiso 1 1 calc R . . 
C5 C 1.0218(4) 0.4951(6) 0.10940(19) 0.0438(11) Uani 1 1 d . . . 
C6 C 1.0525(5) 0.6579(6) 0.1204(2) 0.0516(12) Uani 1 1 d . . . 
C7 C 1.1566(4) 0.7099(6) 0.1078(2) 0.0534(13) Uani 1 1 d . . . 
H7A H 1.1779 0.8171 0.1151 0.064 Uiso 1 1 calc R . . 
C8 C 1.2293(4) 0.6074(6) 0.0849(2) 0.0471(12) Uani 1 1 d . . . 
C9 C 1.1957(4) 0.4451(6) 0.0741(2) 0.0470(12) Uani 1 1 d . . . 
H9A H 1.2432 0.3748 0.0588 0.056 Uiso 1 1 calc R . . 
C10 C 1.0916(4) 0.3871(6) 0.0860(2) 0.0451(11) Uani 1 1 d . . . 
C11 C 0.9755(6) 0.7742(7) 0.1455(3) 0.0722(18) Uani 1 1 d . . . 
H11A H 0.8993 0.7665 0.1228 0.108 Uiso 1 1 calc R . . 
H11B H 1.0029 0.8825 0.1435 0.108 Uiso 1 1 calc R . . 
H11C H 0.9757 0.7468 0.1861 0.108 Uiso 1 1 calc R . . 
C12 C 1.3430(4) 0.6656(8) 0.0724(2) 0.0623(15) Uani 1 1 d . . . 
H12A H 1.3306 0.7571 0.0463 0.093 Uiso 1 1 calc R . . 
H12B H 1.3779 0.5804 0.0540 0.093 Uiso 1 1 calc R . . 
H12C H 1.3922 0.6960 0.1090 0.093 Uiso 1 1 calc R . . 
C13 C 1.0593(5) 0.2110(7) 0.0738(3) 0.0720(17) Uani 1 1 d . . . 
H13A H 1.0297 0.1679 0.1064 0.108 Uiso 1 1 calc R . . 
H13B H 1.1254 0.1507 0.0692 0.108 Uiso 1 1 calc R . . 
H13C H 1.0023 0.2032 0.0382 0.108 Uiso 1 1 calc R . . 
C14 C 0.7320(4) 0.3102(6) 0.21922(18) 0.0393(10) Uani 1 1 d . . . 
C15 C 0.6763(4) 0.4204(6) 0.2501(2) 0.0454(11) Uani 1 1 d . . . 
C16 C 0.6242(4) 0.3591(6) 0.2959(2) 0.0483(12) Uani 1 1 d . . . 
H16A H 0.5852 0.4298 0.3161 0.058 Uiso 1 1 calc R . . 
C17 C 0.6298(4) 0.1969(6) 0.3113(2) 0.0474(12) Uani 1 1 d . . . 
C18 C 0.6882(4) 0.0919(6) 0.2806(2) 0.0535(13) Uani 1 1 d . . . 
H18A H 0.6917 -0.0170 0.2906 0.064 Uiso 1 1 calc R . . 
C19 C 0.7415(4) 0.1446(6) 0.2353(2) 0.0492(12) Uani 1 1 d . . . 
C20 C 0.6704(6) 0.5983(7) 0.2350(3) 0.0704(17) Uani 1 1 d . . . 
H20A H 0.7462 0.6403 0.2387 0.106 Uiso 1 1 calc R . . 
H20B H 0.6319 0.6545 0.2617 0.106 Uiso 1 1 calc R . . 
H20C H 0.6296 0.6128 0.1950 0.106 Uiso 1 1 calc R . . 
C21 C 0.5693(5) 0.1357(8) 0.3597(3) 0.0704(17) Uani 1 1 d . . . 
H21A H 0.5430 0.2259 0.3794 0.106 Uiso 1 1 calc R . . 
H21B H 0.6214 0.0728 0.3879 0.106 Uiso 1 1 calc R . . 
H21C H 0.5056 0.0700 0.3421 0.106 Uiso 1 1 calc R . . 
C22 C 0.8069(6) 0.0258(7) 0.2031(3) 0.0751(19) Uani 1 1 d . . . 
H22A H 0.7971 -0.0819 0.2166 0.113 Uiso 1 1 calc R . . 
H22B H 0.8864 0.0530 0.2114 0.113 Uiso 1 1 calc R . . 
H22C H 0.7781 0.0322 0.1611 0.113 Uiso 1 1 calc R . . 
 
loop_ 
 _atom_site_aniso_label 
 _atom_site_aniso_U_11 
 _atom_site_aniso_U_22 
 _atom_site_aniso_U_33 
 _atom_site_aniso_U_23 
 _atom_site_aniso_U_13 
 _atom_site_aniso_U_12 
Cu1 0.0524(6) 0.0582(6) 0.0511(5) 0.0042(4) 0.0163(4) 0.0137(4) 
Cu2 0.0417(5) 0.0441(5) 0.0353(4) 0.000 0.0098(3) 0.000 
F1 0.116(3) 0.074(3) 0.099(3) 0.005(2) 0.026(2) 0.036(2) 
F2 0.104(3) 0.120(4) 0.059(2) 0.020(2) 0.0128(19) 0.038(3) 
F3 0.056(2) 0.134(4) 0.132(4) 0.039(3) 0.025(2) 0.028(2) 
N1 0.040(2) 0.061(3) 0.037(2) 0.0034(18) 0.0085(16) 0.005(2) 
N2 0.040(2) 0.056(3) 0.040(2) 0.0086(18) 0.0091(16) -0.0010(19) 
C1 0.066(4) 0.081(4) 0.059(4) 0.012(3) 0.023(3) 0.025(3) 
C2 0.046(3) 0.042(3) 0.037(2) 0.0026(19) 0.0122(19) 0.005(2) 
C3 0.053(3) 0.087(4) 0.036(3) 0.010(3) 0.010(2) 0.006(3) 
C4 0.050(3) 0.091(5) 0.042(3) 0.008(3) 0.004(2) -0.003(3) 
C5 0.045(3) 0.053(3) 0.033(2) 0.007(2) 0.0083(19) 0.004(2) 
C6 0.062(3) 0.049(3) 0.047(3) -0.002(2) 0.016(2) 0.008(3) 
C7 0.059(3) 0.044(3) 0.059(3) -0.006(2) 0.017(2) -0.010(3) 
C8 0.044(3) 0.058(3) 0.040(2) 0.005(2) 0.010(2) -0.005(2) 
C9 0.044(3) 0.052(3) 0.049(3) 0.002(2) 0.017(2) 0.001(2) 
C10 0.051(3) 0.042(3) 0.043(3) 0.002(2) 0.012(2) 0.001(2) 
C11 0.079(4) 0.050(3) 0.098(5) -0.005(3) 0.045(4) 0.012(3) 
C12 0.048(3) 0.079(4) 0.061(3) 0.003(3) 0.015(2) -0.014(3) 
C13 0.066(4) 0.049(4) 0.108(5) -0.001(3) 0.035(4) 0.000(3) 
C14 0.036(2) 0.045(3) 0.038(2) 0.0024(19) 0.0086(17) -0.007(2) 
C15 0.040(3) 0.048(3) 0.046(3) 0.000(2) 0.0047(19) 0.001(2) 
C16 0.048(3) 0.058(3) 0.040(3) -0.002(2) 0.013(2) 0.006(2) 
C17 0.045(3) 0.057(3) 0.041(3) 0.009(2) 0.009(2) 0.001(2) 
C18 0.062(3) 0.045(3) 0.056(3) 0.008(2) 0.017(2) -0.003(3) 
C19 0.049(3) 0.050(3) 0.051(3) -0.003(2) 0.014(2) 0.002(2) 
C20 0.090(5) 0.051(4) 0.074(4) 0.005(3) 0.028(3) 0.011(3) 
C21 0.059(4) 0.098(5) 0.058(3) 0.010(3) 0.020(3) -0.013(3) 
C22 0.096(5) 0.048(4) 0.090(5) -0.009(3) 0.039(4) 0.004(3) 
 
_geom_special_details 
; 
 All esds (except the esd in the dihedral angle between two l.s. planes) 
 are estimated using the full covariance matrix.  The cell esds are taken 
 into account individually in the estimation of esds in distances, angles 
 and torsion angles; correlations between esds in cell parameters are only 
 used when they are defined by crystal symmetry.  An approximate (isotropic) 
 treatment of cell esds is used for estimating esds involving l.s. planes. 
; 
 
loop_ 
 _geom_bond_atom_site_label_1 
 _geom_bond_atom_site_label_2 
 _geom_bond_distance 
 _geom_bond_site_symmetry_2 
 _geom_bond_publ_flag 
Cu1 C1 1.970(6) 3_675 ? 
Cu1 C1 1.970(6) . ? 
Cu2 C2 1.959(5) . ? 
Cu2 C2 1.959(5) 2_755 ? 
F1 C1 1.437(8) . ? 
F2 C1 1.419(7) . ? 
F3 C1 1.403(7) . ? 
N1 C2 1.365(6) . ? 
N1 C5 1.497(6) . ? 
N1 C3 1.520(7) . ? 
N2 C2 1.379(6) . ? 
N2 C14 1.480(6) . ? 
N2 C4 1.516(6) . ? 
C3 C4 1.586(7) . ? 
C3 H3A 0.9900 . ? 
C3 H3B 0.9900 . ? 
C4 H4A 0.9900 . ? 
C4 H4B 0.9900 . ? 
C5 C10 1.433(7) . ? 
C5 C6 1.438(8) . ? 
C6 C7 1.431(7) . ? 
C6 C11 1.557(7) . ? 
C7 C8 1.422(7) . ? 
C7 H7A 0.9500 . ? 
C8 C9 1.441(7) . ? 
C8 C12 1.558(7) . ? 
C9 C10 1.442(7) . ? 
C9 H9A 0.9500 . ? 
C10 C13 1.553(8) . ? 
C11 H11A 0.9800 . ? 
C11 H11B 0.9800 . ? 
C11 H11C 0.9800 . ? 
C12 H12A 0.9800 . ? 
C12 H12B 0.9800 . ? 
C12 H12C 0.9800 . ? 
C13 H13A 0.9800 . ? 
C13 H13B 0.9800 . ? 
C13 H13C 0.9800 . ? 
C14 C15 1.433(7) . ? 
C14 C19 1.449(7) . ? 
C15 C16 1.451(7) . ? 
C15 C20 1.544(8) . ? 
C16 C17 1.418(8) . ? 
C16 H16A 0.9500 . ? 
C17 C18 1.422(7) . ? 
C17 C21 1.562(7) . ? 
C18 C19 1.426(7) . ? 
C18 H18A 0.9500 . ? 
C19 C22 1.569(8) . ? 
C20 H20A 0.9800 . ? 
C20 H20B 0.9800 . ? 
C20 H20C 0.9800 . ? 
C21 H21A 0.9800 . ? 
C21 H21B 0.9800 . ? 
C21 H21C 0.9800 . ? 
C22 H22A 0.9800 . ? 
C22 H22B 0.9800 . ? 
C22 H22C 0.9800 . ? 
 
loop_ 
 _geom_angle_atom_site_label_1 
 _geom_angle_atom_site_label_2 
 _geom_angle_atom_site_label_3 
 _geom_angle 
 _geom_angle_site_symmetry_1 
 _geom_angle_site_symmetry_3 
 _geom_angle_publ_flag 
C1 Cu1 C1 180.0(3) 3_675 . ? 
C2 Cu2 C2 179.3(3) . 2_755 ? 
C2 N1 C5 124.9(4) . . ? 
C2 N1 C3 113.8(4) . . ? 
C5 N1 C3 120.9(4) . . ? 
C2 N2 C14 124.3(4) . . ? 
C2 N2 C4 113.1(4) . . ? 
C14 N2 C4 122.2(4) . . ? 
F3 C1 F2 103.2(5) . . ? 
F3 C1 F1 101.7(5) . . ? 
F2 C1 F1 101.6(5) . . ? 
F3 C1 Cu1 116.3(4) . . ? 
F2 C1 Cu1 117.0(4) . . ? 
F1 C1 Cu1 114.8(4) . . ? 
N1 C2 N2 108.5(4) . . ? 
N1 C2 Cu2 128.3(4) . . ? 
N2 C2 Cu2 123.2(3) . . ? 
N1 C3 C4 101.7(4) . . ? 
N1 C3 H3A 111.4 . . ? 
C4 C3 H3A 111.4 . . ? 
N1 C3 H3B 111.4 . . ? 
C4 C3 H3B 111.4 . . ? 
H3A C3 H3B 109.3 . . ? 
N2 C4 C3 102.5(4) . . ? 
N2 C4 H4A 111.3 . . ? 
C3 C4 H4A 111.3 . . ? 
N2 C4 H4B 111.3 . . ? 
C3 C4 H4B 111.3 . . ? 
H4A C4 H4B 109.2 . . ? 
C10 C5 C6 121.7(5) . . ? 
C10 C5 N1 119.2(4) . . ? 
C6 C5 N1 119.1(4) . . ? 
C7 C6 C5 118.0(5) . . ? 
C7 C6 C11 120.9(5) . . ? 
C5 C6 C11 121.1(5) . . ? 
C8 C7 C6 122.6(5) . . ? 
C8 C7 H7A 118.7 . . ? 
C6 C7 H7A 118.7 . . ? 
C7 C8 C9 118.0(4) . . ? 
C7 C8 C12 121.8(5) . . ? 
C9 C8 C12 120.1(5) . . ? 
C8 C9 C10 121.5(5) . . ? 
C8 C9 H9A 119.3 . . ? 
C10 C9 H9A 119.3 . . ? 
C5 C10 C9 118.3(5) . . ? 
C5 C10 C13 122.2(5) . . ? 
C9 C10 C13 119.6(5) . . ? 
C6 C11 H11A 109.5 . . ? 
C6 C11 H11B 109.5 . . ? 
H11A C11 H11B 109.5 . . ? 
C6 C11 H11C 109.5 . . ? 
H11A C11 H11C 109.5 . . ? 
H11B C11 H11C 109.5 . . ? 
C8 C12 H12A 109.5 . . ? 
C8 C12 H12B 109.5 . . ? 
H12A C12 H12B 109.5 . . ? 
C8 C12 H12C 109.5 . . ? 
H12A C12 H12C 109.5 . . ? 
H12B C12 H12C 109.5 . . ? 
C10 C13 H13A 109.5 . . ? 
C10 C13 H13B 109.5 . . ? 
H13A C13 H13B 109.5 . . ? 
C10 C13 H13C 109.5 . . ? 
H13A C13 H13C 109.5 . . ? 
H13B C13 H13C 109.5 . . ? 
C15 C14 C19 121.3(4) . . ? 
C15 C14 N2 119.5(4) . . ? 
C19 C14 N2 119.2(4) . . ? 
C14 C15 C16 117.7(5) . . ? 
C14 C15 C20 121.6(4) . . ? 
C16 C15 C20 120.7(5) . . ? 
C17 C16 C15 122.0(4) . . ? 
C17 C16 H16A 119.0 . . ? 
C15 C16 H16A 119.0 . . ? 
C16 C17 C18 118.6(4) . . ? 
C16 C17 C21 120.1(5) . . ? 
C18 C17 C21 121.3(5) . . ? 
C17 C18 C19 122.3(5) . . ? 
C17 C18 H18A 118.9 . . ? 
C19 C18 H18A 118.9 . . ? 
C18 C19 C14 118.1(4) . . ? 
C18 C19 C22 120.8(5) . . ? 
C14 C19 C22 121.1(5) . . ? 
C15 C20 H20A 109.5 . . ? 
C15 C20 H20B 109.5 . . ? 
H20A C20 H20B 109.5 . . ? 
C15 C20 H20C 109.5 . . ? 
H20A C20 H20C 109.5 . . ? 
H20B C20 H20C 109.5 . . ? 
C17 C21 H21A 109.5 . . ? 
C17 C21 H21B 109.5 . . ? 
H21A C21 H21B 109.5 . . ? 
C17 C21 H21C 109.5 . . ? 
H21A C21 H21C 109.5 . . ? 
H21B C21 H21C 109.5 . . ? 
C19 C22 H22A 109.5 . . ? 
C19 C22 H22B 109.5 . . ? 
H22A C22 H22B 109.5 . . ? 
C19 C22 H22C 109.5 . . ? 
H22A C22 H22C 109.5 . . ? 
H22B C22 H22C 109.5 . . ? 
 
_diffrn_measured_fraction_theta_max    0.925 
_diffrn_reflns_theta_full              31.89 
_diffrn_measured_fraction_theta_full   0.925 
_refine_diff_density_max    0.892 
_refine_diff_density_min   -0.645 
_refine_diff_density_rms    0.095 
